# Supplementary material for: Ionic liquid assisted hydrothermal synthesis of MoS2 double-shell polyhedral cages with enhanced catalytic hydrogenation activities
Source: Royal Society of Chemistry journal article supplement (doi:10.1039/c7ra02482g), 2017-01-01
Supplement: c7ra02482g1.pdf [file c7ra02482g1.pdf]

**Electronic Supplementary Information for**  
**Ionic liquid assisted hydrothermal synthesis of MoS<sub>2</sub> double-shell**  
**polyhedral cages with enhanced catalytic hydrogenation activities**

Jiahe Li<sup>a,b</sup>, Donge Wang<sup>a</sup>, Huaijun Ma<sup>a</sup>, Min Li<sup>a,b</sup>, Zhendong Pan<sup>a</sup>, Yuxia Jiang<sup>a,b</sup>,  
Zhijian Tian<sup>a,c,\*</sup>

<sup>a</sup> *Dalian National Laboratory for Clean Energy, Dalian Institute of Chemical Physics,  
Chinese Academy of Sciences, Dalian 116023, China*

<sup>b</sup> *University of Chinese Academy of Sciences, Beijing 100049, China*

<sup>c</sup> *State Key Laboratory of Catalysis, Dalian Institute of Chemical Physics, Chinese  
Academy of Sciences, Dalian 116023, China*

**\* Corresponding author:**

**Tel: 86-411-84379151, Fax: 86-411-84379151**

**Email address: tianz@dicp.ac.cn**

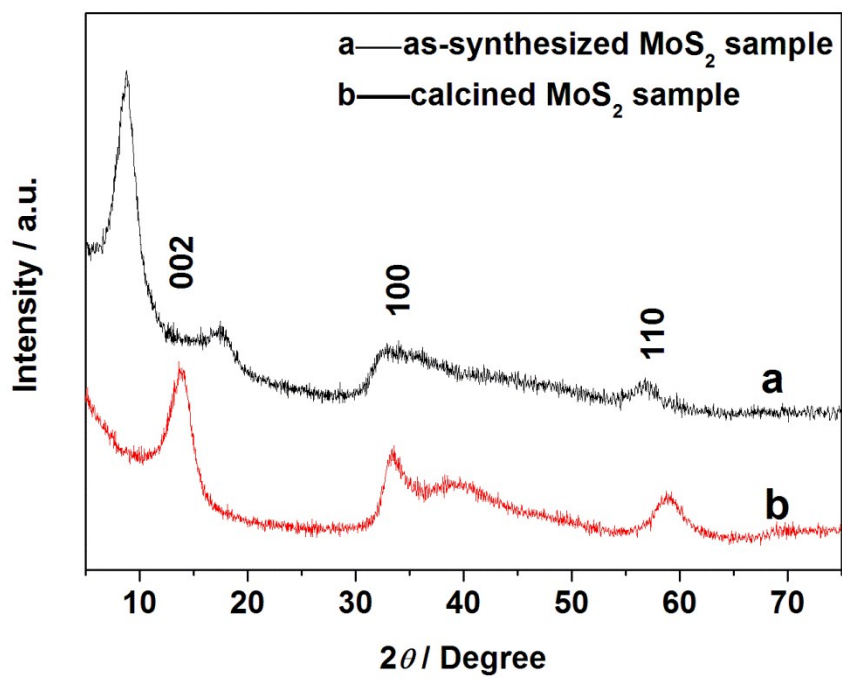

Figure S1 XRD patterns of (a) as-synthesized MoS<sub>2</sub> double-shell polyhedral cages sample and (b) calcined MoS<sub>2</sub> double-shell polyhedral cages sample at 350°C under H<sub>2</sub> atmosphere for 2h.

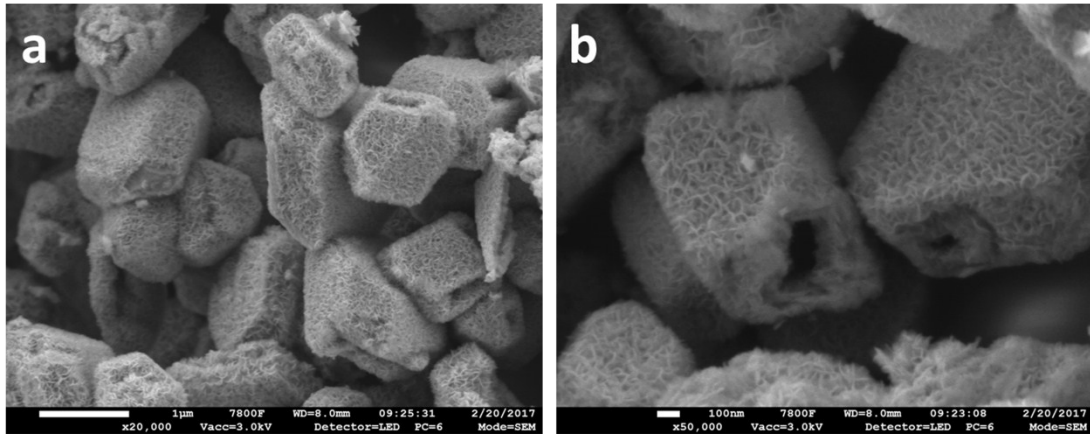

Figure S2 SEM images of calcined MoS<sub>2</sub> double-shell polyhedral cages sample at 350°C under H<sub>2</sub> atmosphere for 2h.

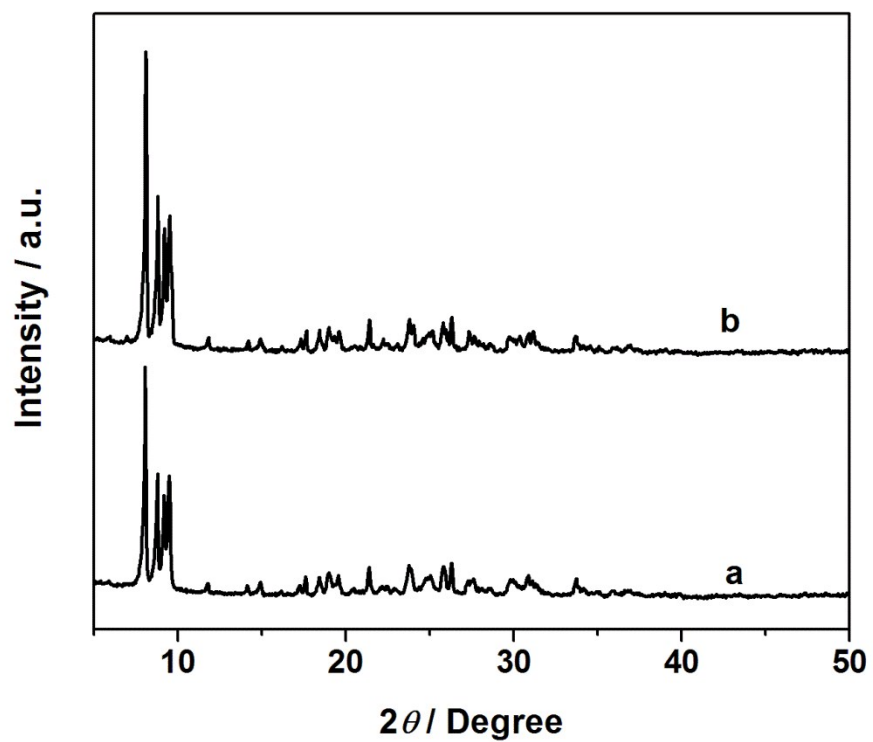

Figure S3 XRD patterns of (a) precursor MS-t-1 and (b) hydrothermal products of PMA and ILs after reaction for 1 h.

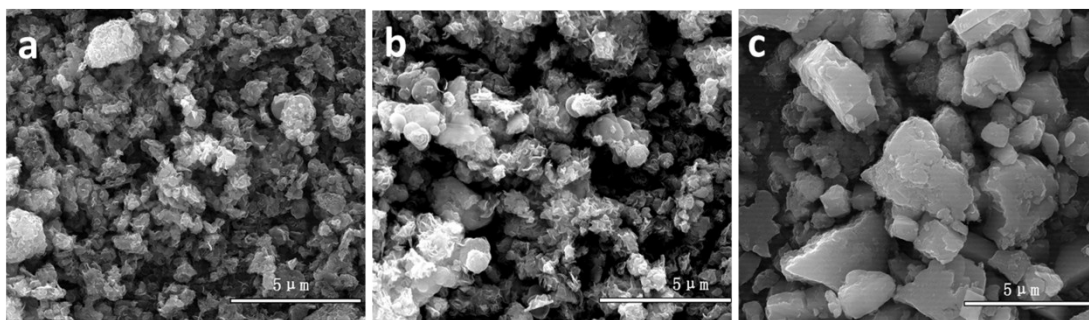

Figure S4 SEM images of MoS<sub>2</sub> products synthesized using (a) thioacetamide (CH<sub>3</sub>CSNH<sub>2</sub>), (b) thiourea (CS (NH<sub>2</sub>)<sub>2</sub>) and (c) elemental sulfur (S) as sulfur sources.

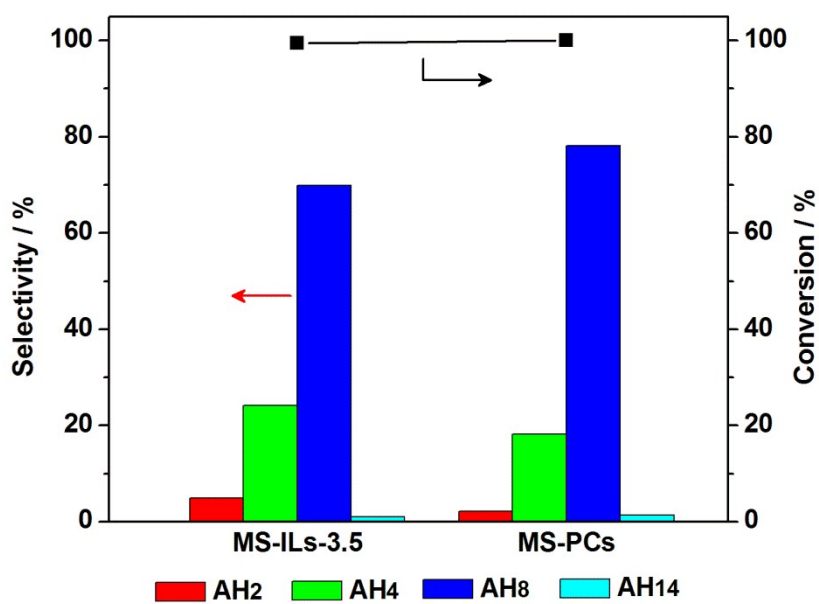

Figure S5 Selectivity and conversion of anthracene hydrogenation reaction using MoS<sub>2</sub> single-shell polyhedral cages MS-ILs-3.5 and double-shell polyhedral cages MS-PCs as catalysts. Reaction conditions: T = 350 °C, P<sub>H<sub>2</sub></sub> = 8 MPa, t = 4 h, 2.5 wt. % Cat.

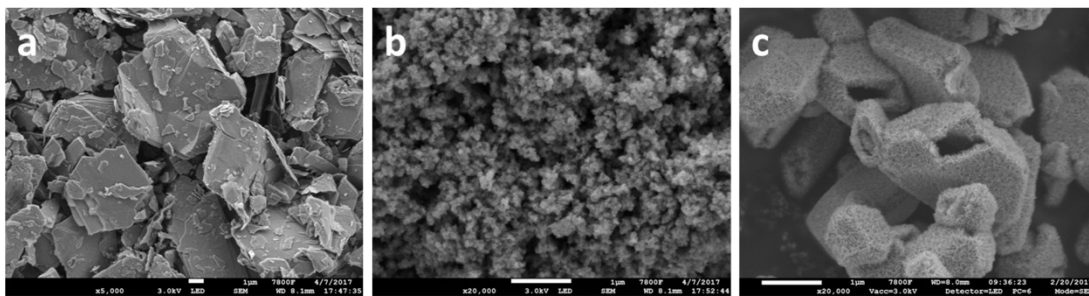

Figure S6 SEM images of (a) MS-com, (b) MS-NPs and (c) MS-PCs after anthracene hydrogenation reaction (Reaction conditions: T = 350 °C, PH<sub>2</sub> = 8 MPa, t = 4 h).

After anthracene hydrogenation reaction, MS-Com was composed of micro-sized MoS<sub>2</sub> layers, MS-NPs were aggregates of nanoparticles and MS-PCs showed morphology of polyhedral cages, showing no obvious change of morphology. Thus the structural stability of as-synthesized MoS<sub>2</sub> samples was very well.
